# Supplementary material for: Strategic design and synthesis of star-shaped organic linkers for mesoporous MOFs
Source: Royal Society of Chemistry journal article supplement (doi:10.1039/d1fd00026h), 2021-01-01

## Strategic design and synthesis of star-shaped organic linkers for mesoporous MOFs

Rosa Fucci<sup>a</sup> and Christophe M. L. Vande Velde <sup>\*a</sup>

<sup>a</sup>*Intelligence in Processes, Advanced Catalysts and Solvents (iPRACS), Faculty of Applied Engineering, University of Antwerp, Groenenborgerlaan 171, 2020 Antwerpen, Belgium*

\* [christophe.vandavelde@uantwerpen.be](mailto:christophe.vandavelde@uantwerpen.be) +3232651846

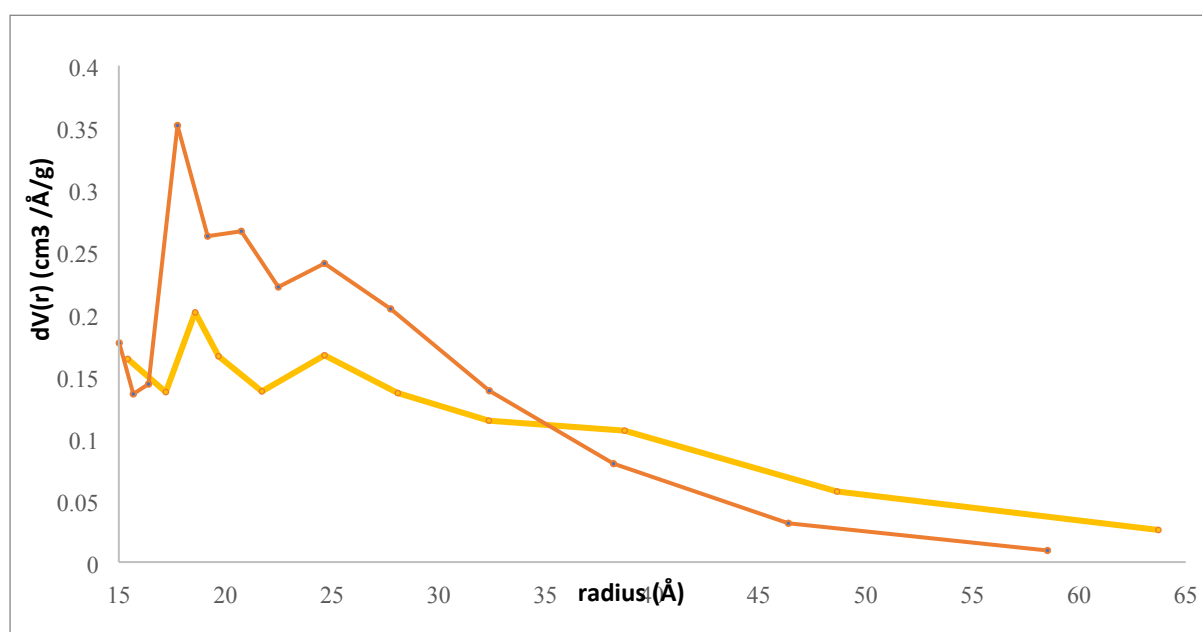

Figure 1. Pore size distribution **La-16-1**. Yellow shows adsorption, Orange shows desorption.

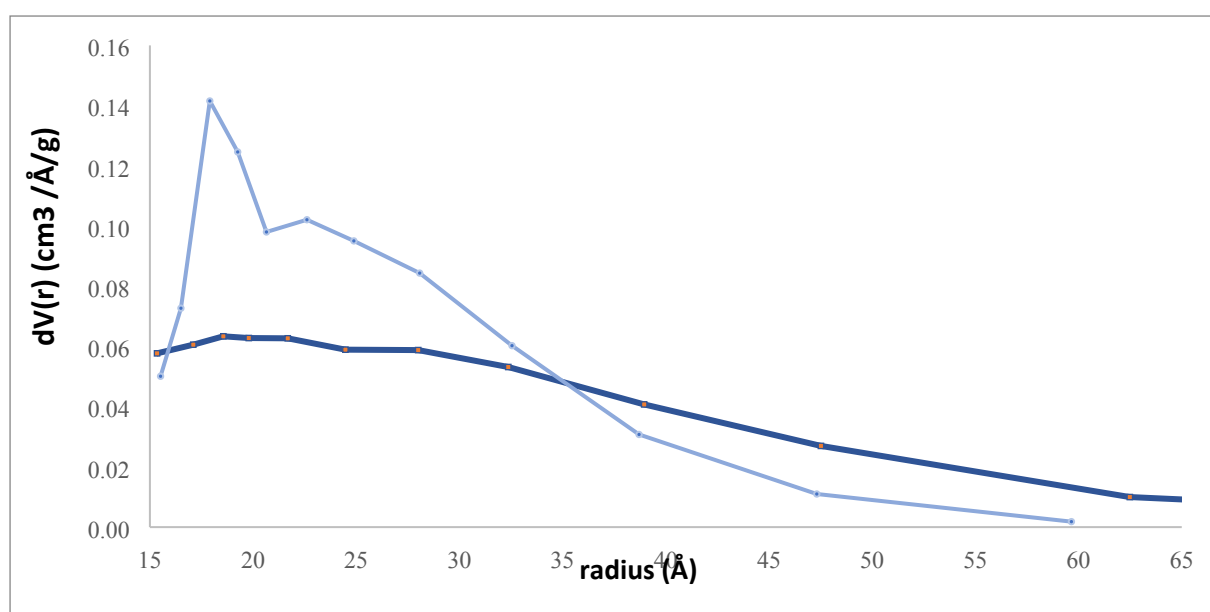

Figure 2. Pore size distribution for **La-16-2**. Dark blue indicates adsorption, Light blue indicates desorption.

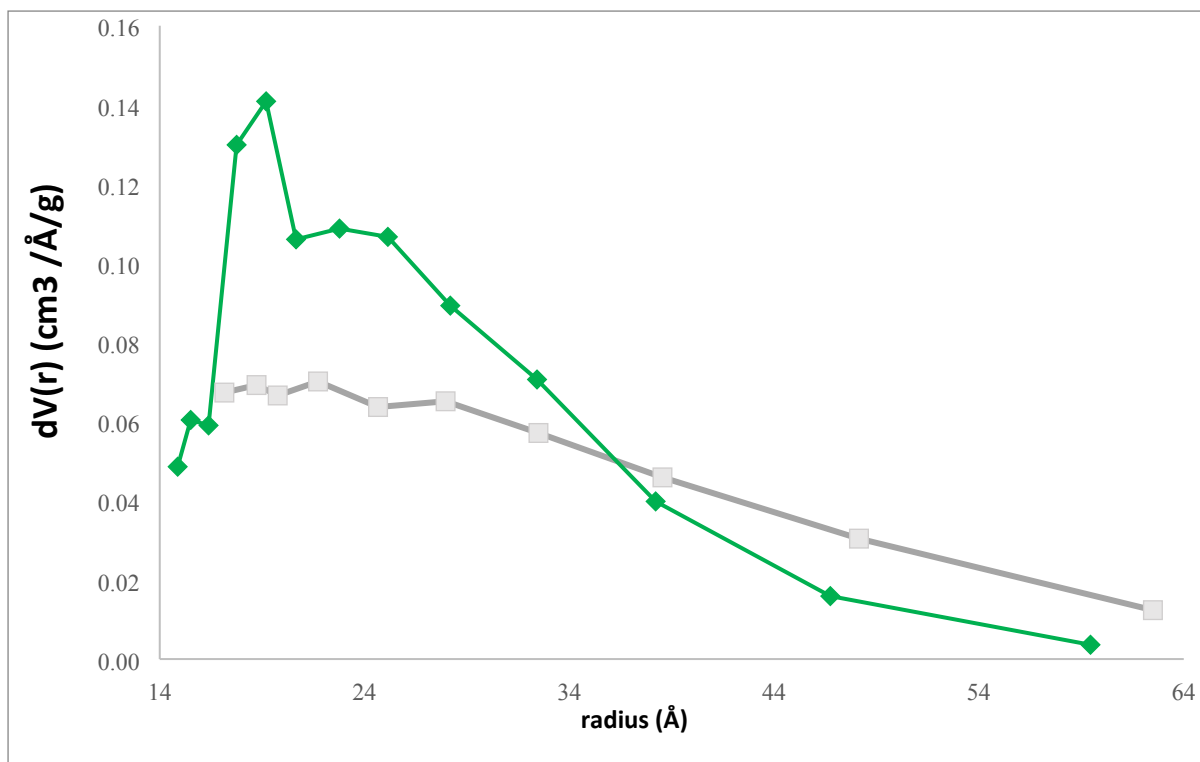

Figure 3. Pore size distribution for **La-16-3**. Grey indicates adsorption, green indicates desorption

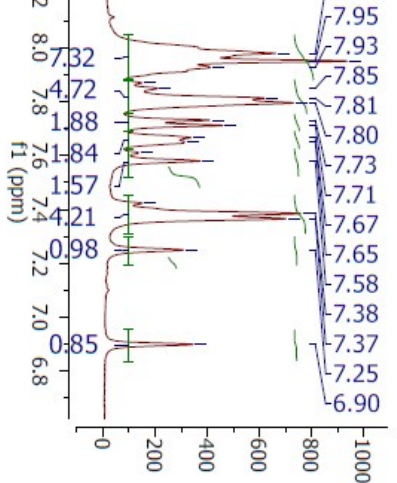

<sup>1</sup>H NMR (400 MHz, DMSO) δ 10.51 (s, 1H), 9.85 (s, 1H), 7.95 (t, *J* = 10.4 Hz, 8H), 7.83 (dd, *J* = 22.2, 7.7 Hz, 5H), 7.72 (d, *J* = 7.8 Hz, 2H), 7.66 (d, *J* = 5.6 Hz, 2H), 7.59 (d, *J* = 12.1 Hz, 2H), 7.39 (t, *J* = 11.4 Hz, 5H), 7.25 (s, 1H), 6.90 (s, 1H), 3.79 (s, 2H), 2.89 (s, 4H), 2.75 (s, 4H), 2.35 (s, 7H).

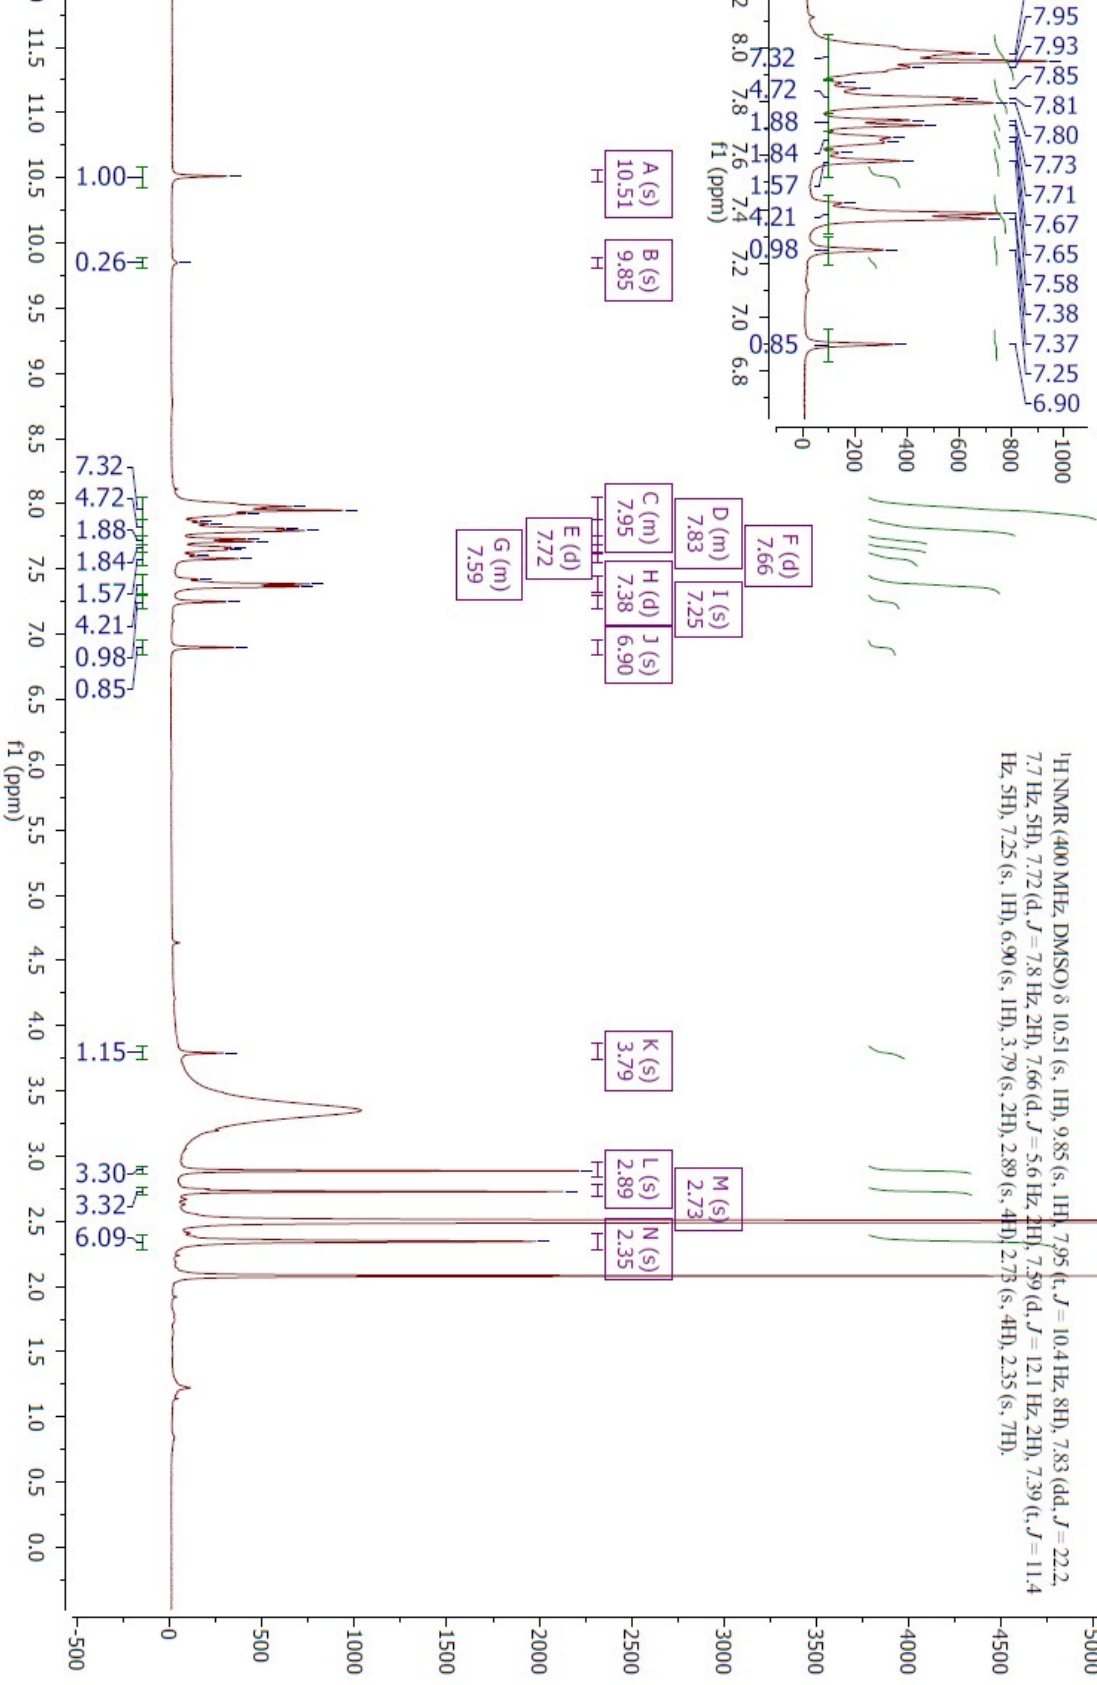

Supplement: d1fd00026h1.pdf [file d1fd00026h1.pdf]
